# Supplementary material
Source: HighWire-hosted journal article supplement (http://jpet.aspetjournals.org/highwire/filestream/136426/field_highwire_adjunct_files/0/JPET_206888_PHLPP_Manuscript_2013_Supplementary.pdf)
Supplement: JPET_206888_PHLPP_Manuscript_2013_Supplementary.pdf [file JPET_206888_PHLPP_Manuscript_2013_Supplementary.pdf]

**Journal:** Journal of Pharmacology and Experimental Therapeutics

**Title:** Pharmacological Inhibition of Pleckstrin Homology Domain Leucine-Rich Repeat Protein Phosphatase (PHLPP) is Neuroprotective: Differential Effects on Astrocytes.

**Authors:** Travis C. Jackson, Jonathan D. Verrier, Tomas Drabek, Keri Janesko-Feldman, Delbert G. Gillespie, Thomas Uray, Cameron DeZfulian, Robert S. Clark, Hülya Bayir, Edwin K. Jackson, Patrick M. Kochanek.

## Supplementary Figure 1

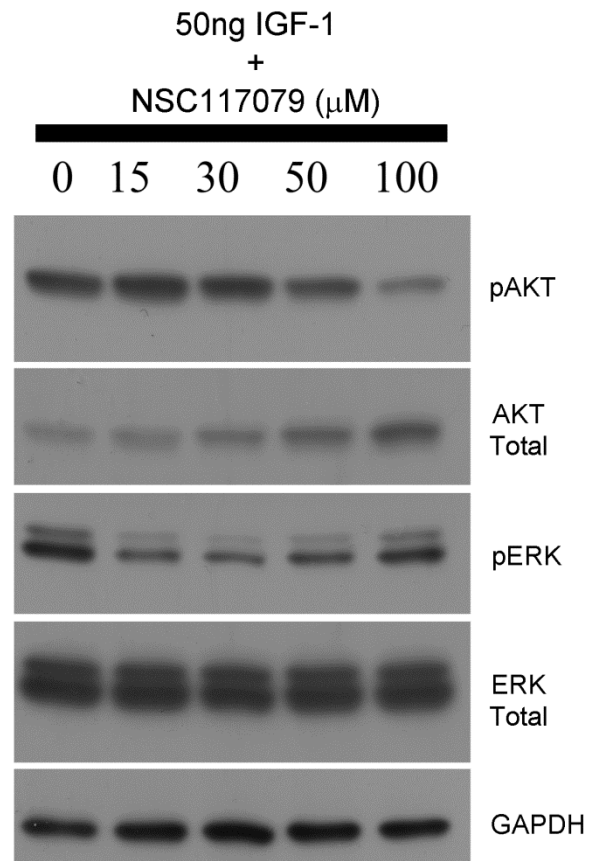

**Supplementary Figure 1: PHLPP Inhibitor NSC117079 Inhibits IGF-1 Induced AKT Activation.** Primary rat cortical neurons were grown onto 6-well plates, supplement starved 2h, and treated with 50ng/mL IGF-1 in the absence (control) or presence of increasing NSC117079 doses. Blots show that NSC117079 dose dependently decreases pAKT473 levels. pERK is altered by NSC117079 in a manner similar to non-stimulation conditions.

Supplementary Figure 2

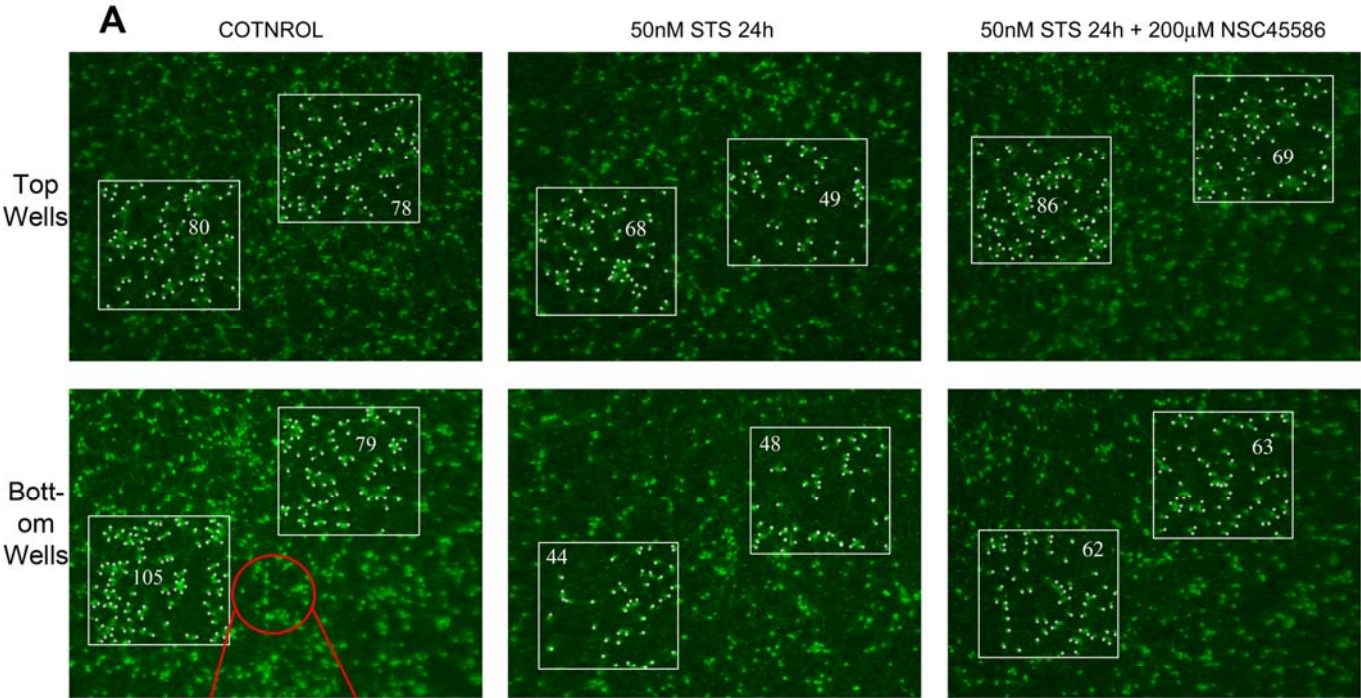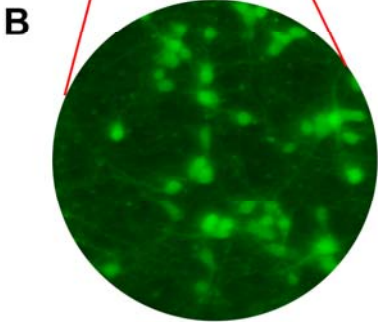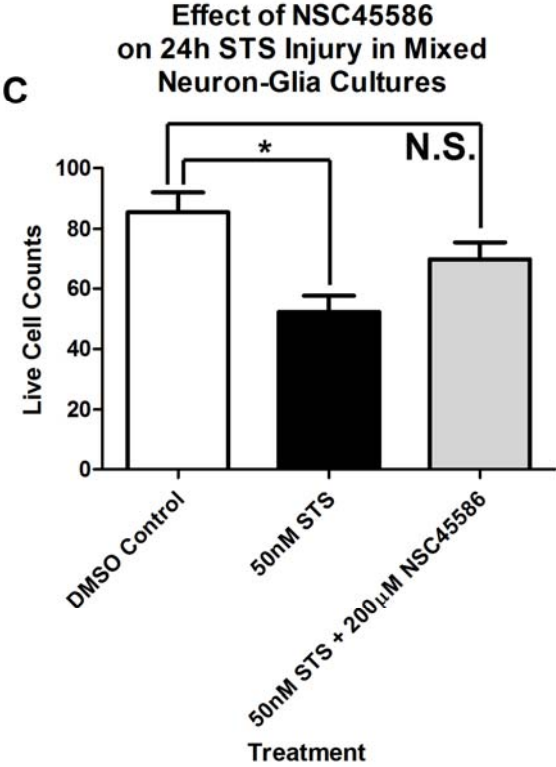

### **Supplementary Figure 2: PHLPP Inhibitor NSC45586 Increases Neuronal Survival.**

Mixed primary rat cortical neurons and astrocytes were grown on an 8-well glass chamber slide. At DIV8 cultures were treated with DMSO (control), 50nM STS, or 50nM STS + 200 $\mu$ M NSC45586 for 24h; 2 wells per group (i.e. 1 top well and 1 bottom well of the chamber slide). After 24h injury, cells were washed twice with DPBS, and incubated with Calcein AM (2 $\mu$ M) dissolved in DPBS for ~10mins. **(A)** Live cell images were captured on a fluorescent microscope (10X objective). **(B)** An enlarged representative area from a control image shows green fluorescence in the neuronal soma and axons/dendrites. **(C)** Cell count analysis. 2 white boxes of equal size were randomly placed in each image field. Green (live) cells were counted in Photoshop. A white spot was placed next to each cell for counting accuracy. The total cell counts were averaged, and analyzed for each group in Prism software. The injury alone group (50nM STS) had significantly fewer live-green cells compared with uninjured DMSO control. Addition of NSC45586 reduced cell loss. Data were analyzed by ANOVA and Newman-Keuls Multiple Comparison post-hoc test. (\*) indicates significant post-hoc difference ( $p < 0.05$ ) compared to non-injured control. Graphs show mean + SEM.

Supplementary Figure 3

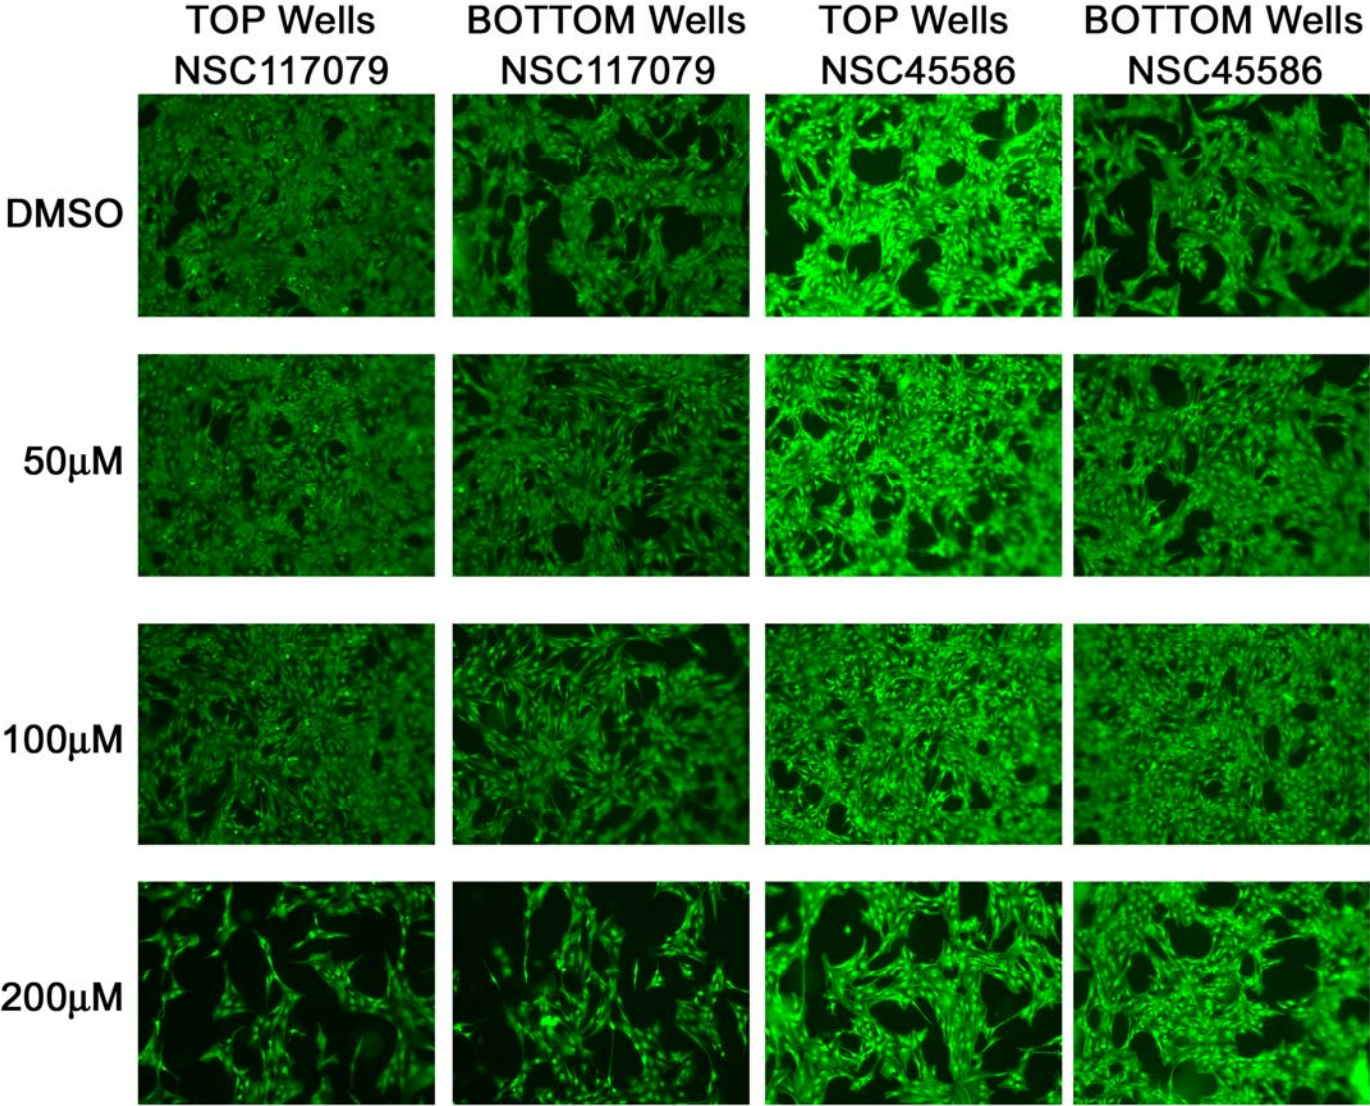

**Supplementary Figure 3: PHLPP Inhibitor NSC117079 Induces Astrocyte Cell Death.** Primary rat astrocytes were seeded on (2X) 8-well chamber glass slides and grown for ~48h (to ~80-90% confluence). Cells were incubated for 24h with increasing

concentrations of NSC117079 or NSC45586. 24h later cells were washed twice with DPBS, and incubated with Calcein AM (2 $\mu$ M) dissolved in DPBS for ~10mins. Live cell images were captured using a fluorescent microscope (10X objective). 200 $\mu$ M NSC117079 altered astrocyte morphology, and induced cell death. NSC45586 also appeared to alter astrocyte morphology but these changes were not associated with obvious cell death.

## Supplementary Figure 4

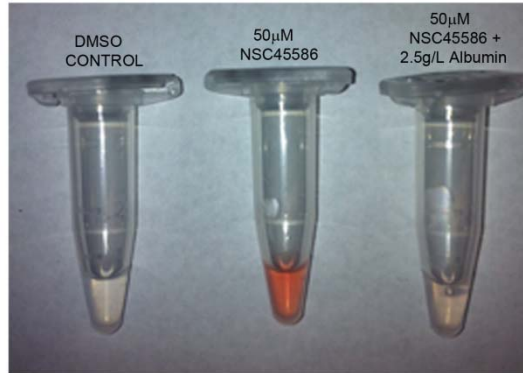

**Supplementary Figure 4: Albumin Binds PHLPP Inhibitor NSC45586.** Primary rat cortical neurons were grown on 6-well plates, supplement starved 2h, treated with 50µM NSC54486 for 35min in the absence or presence of bovine serum albumin, washed with PBS, and protein extracts harvested. Drug treatment stains the harvested protein extracts from clear (i.e. DMSO-control) to red/brown (i.e. 50µM NSC54486) by binding cellular membrane components and/or intracellular drug accumulation. However, in the presence of 2.5g/L albumin (i.e. the same concentration that is used in neuron growth B27 supplement) cellular disposition of NSC45586 is inhibited after 35min incubation – indicating preferential binding to albumin during the acute treatment period. Albumin interference may have decreased the efficacy of NSC45586 in STS injury experiments (i.e. because B27 supplement is a mandatory reagent needed for chronic 24h treatment

studies in neurons and it contains 2.5g/L albumin). In astrocyte viability studies, NSC45586 was also incubated over a 24h period but in the presence of 10% FBS. For comparison (to B27), compositional analysis of FBS stock (reported by the brand/company datasheet; Hyclone/Fisher Scientific) indicates albumin at a concentration of 1.9g/dL (i.e. ~1.9g/L when used at 10% final concentration).



Supplementary Figure 5

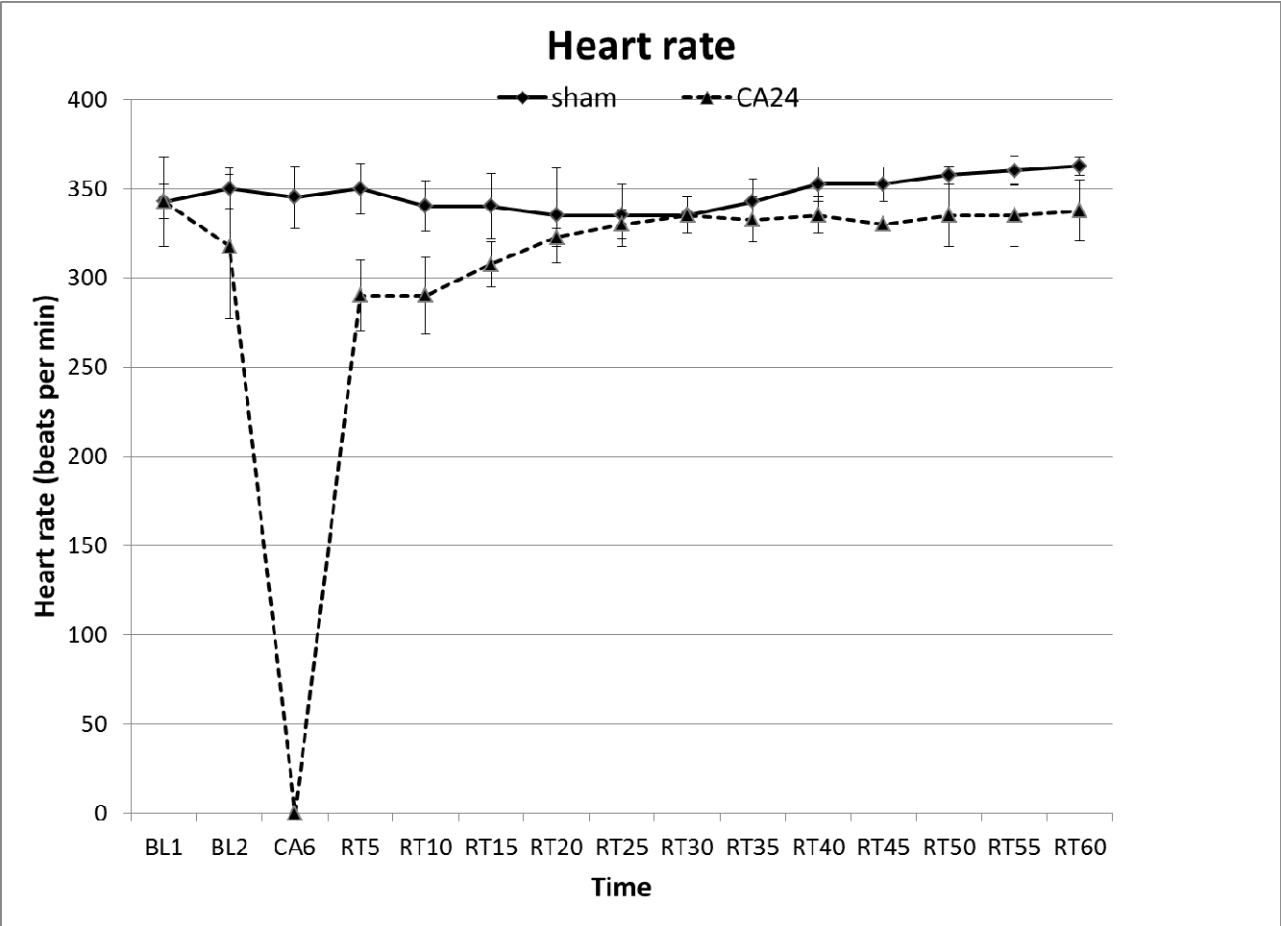

## Supplementary Figure 6

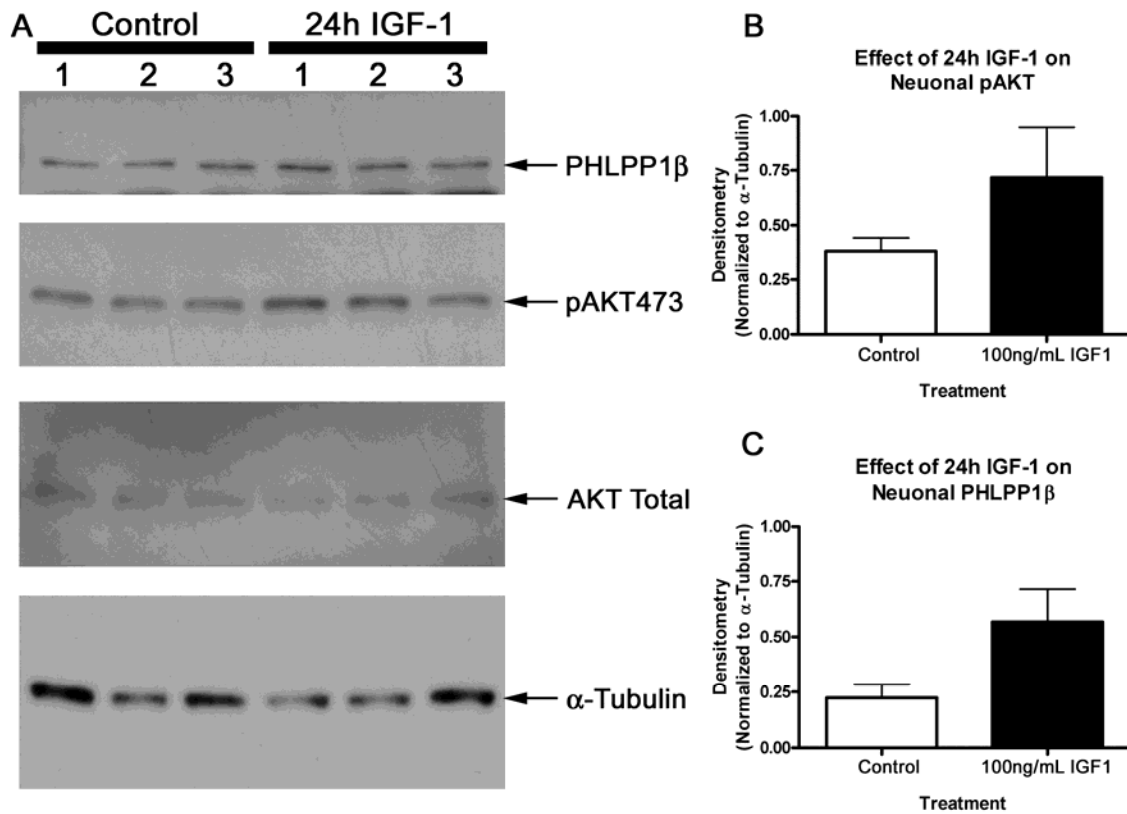

**Supplementary Figure 6: Chronic AKT activation Is Associated With PHLPP1 Upregulation in Primary Neurons.** DIV 12 primary rat cortical neurons were treated 24h with 100ng/mL IGF-1. **(A)** Blots show changes in PHLPP1 $\beta$ , pAKT473, AKT total, and  $\alpha$ -Tubulin after 24h IGF-1 stimulation. Densitometry (n=3/treatment) show that **(B)** PHLPP1 and **(C)** pAKT473 tend to increase after a 24h IGF-1 stimulation. Data were analyzed by T-test. Graphs show mean + SEM.

Supplementary Table 1

**Physiology for VFCA Brain Injury Experiments**

| variable                 | group       | BL1       | BL2       | RT5         | RT15        | RT30        | RT45       | RT60      |
|--------------------------|-------------|-----------|-----------|-------------|-------------|-------------|------------|-----------|
| <b>pHa</b>               | <b>sham</b> | 7.42±0.06 | 7.39±0.06 | 7.39±0.04   | 7.40±0.03   | 7.37±0.01   | 7.40±0.07  | 7.41±0.12 |
|                          | <b>CA24</b> | 7.39±0.03 | 7.39±0.03 | 7.16±0.07** | 7.19±0.07   | 7.33±0.01   | 7.33±0.02  | 7.34±0.01 |
| <b>paO2</b><br>mmHg      | <b>sham</b> | 202±43    | 97±20     | 294±111     | 354±49      | 332±45      | 229±108    | 245±88    |
|                          | <b>CA24</b> | 200±50    | 134±79    | 300±97      | 349±52      | 91±16       | 112±24     | 384±73*   |
| <b>paCO2</b><br>mmHg     | <b>sham</b> | 38±7      | 38±7      | 37±3        | 35±6        | 39±3        | 35±6       | 34±13     |
|                          | <b>CA24</b> | 42±3      | 39±2      | 38±5        | 35±5        | 27±4**      | 37±4       | 36±9      |
| <b>BE</b><br>mEq/L       | <b>sham</b> | -1.0±1.2  | -2.0±0.5  | -2.9±0.7    | -2.0±1.5    | -2.8±1.7    | -2.8±1.3   | -3.5±2.3  |
|                          | <b>CA24</b> | 0.5±1.0   | -1.5±3.1  | -14.2±2.5** | -13.8±2.9** | -10.3±1.7** | -5.6±1.3** | -5.8±3.7  |
| <b>Lactate</b><br>mmol/L | <b>sham</b> | 1.0±0.3   | 0.9±0.3   | 0.8±0.2     | 0.7±0.2     | 0.8±0.3     | 0.6±0.2    | 1±0.8     |
|                          | <b>CA24</b> | 1.2±0.4   | 1.1±0.4   | 11.9±1.6**  | 8.1±0.6**   | 5.5±0.6**   | 2.7±1.0**  | 1.8±0.5   |
| <b>Hct</b>               | <b>sham</b> | 43±2      | 40±3      | 39±2        | 40±3        | 39±2        | 40±3       | 38±3      |
|                          | <b>CA24</b> | 42±2      | 39±2      | 44±2*       | 41±4        | 40±1        | 43±4       | 39±6      |
| <b>Glucose</b><br>mg/dL  | <b>sham</b> | 140±17    | 119±13    | 111±10      | 109±3       | 113±16      | 110±12     | 111±15    |
|                          | <b>CA24</b> | 172±31    | 158±43    | 156±109     | 143±86      | 130±56      | 135±35     | 135±39    |
| <b>Na</b><br>mmol/L      | <b>sham</b> | 140±1     | 142±1     | 143±1       | 143±2       | 144±1       | 145±3      | 145±4     |
|                          | <b>CA24</b> | 140±2     | 142±2     | 146±2       | 146±2       | 145±1       | 146±3      | 147±5     |
| <b>K</b><br>mmol/L       | <b>sham</b> | 4.5±0.4   | 3.9±0.1   | 3.7±0.1     | 3.8±0.3     | 3.8±0.2     | 3.5±0.1    | 4.2±1.9   |
|                          | <b>CA24</b> | 4.3±0.4   | 3.8±0.4   | 5.6±0.5*    | 3.4±0.4     | 4.0±0.0     | 4.2±0.4*   | 3.7±0.8   |
| <b>Cl</b><br>mmol/L      | <b>sham</b> | 110±3     | 115±2     | 116±1       | 117±3       | 117±2       | 117±3      | 119±4     |
|                          | <b>CA24</b> | 107±3     | 112±5     | 113±3       | 115±5       | 117±2       | 117±4      | 119±10    |
| <b>Osmol</b><br>mosm/L   | <b>sham</b> | 288±3     | 291±1     | 293±3       | 293±1       | 293±1       | 296±4      | 296±6     |
|                          | <b>CA24</b> | 289±5     | 294±5     | 301±9       | 300±5       | 298±5       | 300±8      | 303±10    |
|                          |             |           |           |             |             |             |            |           |

BL = baseline. RT = resuscitation time (mins). BE = base excess.

(\*) p<0.05 vs. sham; (\*\*), p<0.01 vs. sham

## Supplementary Table 2

### Mean Arterial Pressures (MAP) for VFCA Brain Injury Experiments

| group |                    | BL1    | BL2    | CA6   | RT5   | RT10   | RT15   |
|-------|--------------------|--------|--------|-------|-------|--------|--------|
| CA24  | Mean               | 81.50  | 86.25  | 5.50  | 67.50 | 63.75  | 53.75  |
|       | N                  | 4      | 4      | 4     | 4     | 4      | 4      |
|       | Std. Deviation     | 11.358 | 9.394  | 2.082 | 9.292 | 18.945 | 8.995  |
|       | Std. Error of Mean | 5.679  | 4.697  | 1.041 | 4.646 | 9.473  | 4.498  |
| sham  | Mean               | 74.25  | 87.00  | 89.75 | 93.25 | 90.50  | 87.75  |
|       | N                  | 4      | 4      | 4     | 4     | 4      | 4      |
|       | Std. Deviation     | 2.630  | 12.649 | 7.676 | 9.179 | 10.083 | 10.340 |
|       | Std. Error of Mean | 1.315  | 6.325  | 3.838 | 4.589 | 5.041  | 5.170  |

Continued Below

| group |                    | RT20  | RT25  | RT30  | RT35   | RT40  | RT45   | RT50   | RT55  | RT60  |
|-------|--------------------|-------|-------|-------|--------|-------|--------|--------|-------|-------|
| CA24  | Mean               | 52.25 | 53.00 | 56.75 | 62.50  | 59.25 | 59.00  | 61.25  | 63.00 | 62.75 |
|       | N                  | 4     | 4     | 4     | 4      | 4     | 4      | 4      | 4     | 4     |
|       | Std. Deviation     | 5.620 | 9.309 | 7.182 | 7.326  | 7.365 | 10.296 | 12.093 | 9.055 | 9.845 |
|       | Std. Error of Mean | 2.810 | 4.655 | 3.591 | 3.663  | 3.683 | 5.148  | 6.047  | 4.528 | 4.922 |
| sham  | Mean               | 80.50 | 75.50 | 76.75 | 100.00 | 93.75 | 91.00  | 90.50  | 89.00 | 86.25 |
|       | N                  | 4     | 4     | 4     | 4      | 4     | 4      | 4      | 4     | 4     |
|       | Std. Deviation     | 8.963 | 8.505 | 8.057 | 13.441 | 9.251 | 9.416  | 7.594  | 6.683 | 8.846 |
|       | Std. Error of Mean | 4.481 | 4.252 | 4.029 | 6.721  | 4.626 | 4.708  | 3.797  | 3.342 | 4.423 |

a.VAR = MAP
